# Supplementary material
Source: Springer Nature journal article supplement (https://www.springermedizin.de/resource/supplementary/12943_2007_328_MOESM4_ESM.pdf/9553936)

a)

CT-2A

Astrocyte

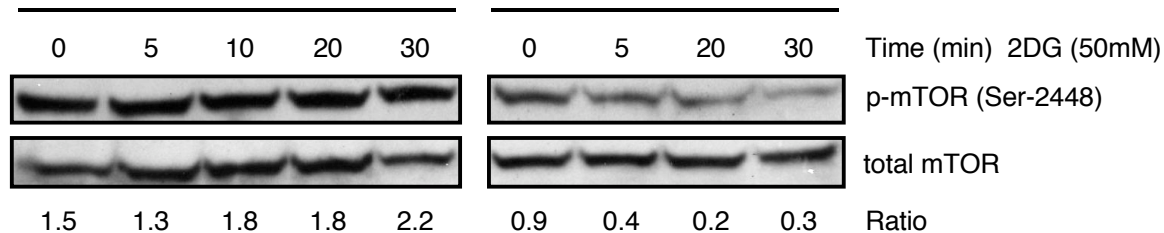

b)

CT-2A

Astrocyte

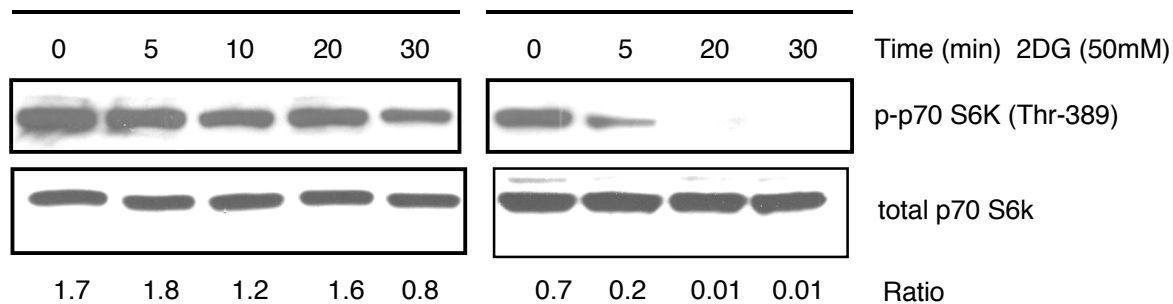

c)

- glucose

- glucose + rapamycin

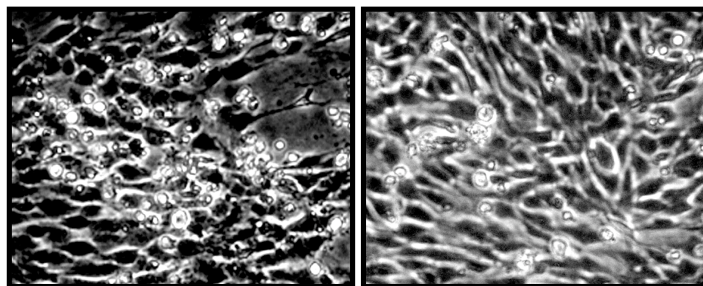

d)

|   |   |           |
|---|---|-----------|
| - | - | glucose   |
| - | + | rapamycin |

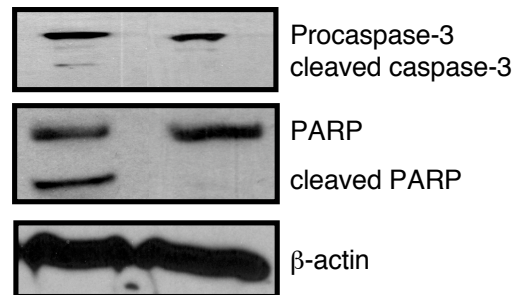

Supplement: MOESM4 [file 9553936]
